# Supplementary material for: Molecular Basis of Unequal Alternative Splicing of Human SCD5 and Its Alteration by Natural Genetic Variations
Source: MDPI journal article supplement (doi:10.3390/ijms24076517), 2023-03-30
Supplement: s1 [file s1]

# Molecular Basis of Unequal Alternative Splicing of Human SCD5 and Its Alteration by Natural Genetic Variations

Gabriella Orosz <sup>1</sup>, Luca Szabó <sup>1</sup>, Szanna Bereti <sup>1</sup>, Veronika Zámbo <sup>1</sup>, Miklós Csala <sup>1,\*</sup> and Éva Kereszturi <sup>1,\*</sup>

<sup>1</sup> Semmelweis University, Department of Molecular Biology, Budapest, Hungary; orosz.gabriella@med.semmelweis-univ.hu (G.O.); saboluca@gmail.com (L.S.); szanna.bereti@gmail.com (S.B.); zambo.veronika@med.semmelweis-univ.hu (V.Z.)

\* Correspondence: csala.miklos@semmelweis.hu (M.C.) and kereszturi.eva@med.semmelweis-univ.hu (É.K.)

## Supplementary Tables

**Table S1.** Standard deviation values of Figure S1B.

| Dilution<br>(rel c) | -log(rel c) | Ct ± S.D.        |                  |
|---------------------|-------------|------------------|------------------|
|                     |             | SCD5A            | SCD5B            |
| 640                 | 2.8062      | 21.8307 ± 0.0431 | 28.7317 ± 0.1735 |
| 320                 | 2.5051      | 22.7080 ± 0.0130 | 29.6060 ± 0.1310 |
| 160                 | 2.2041      | 23.7545 ± 0.0403 | 30.5980 ± 0.1861 |
| 80                  | 1.9031      | 24.9387 ± 0.0530 | 31.9597 ± 0.0798 |
| 40                  | 1.6021      | 25.7480 ± 0.0638 | 32.6195 ± 0.1407 |

**Table S2.** Standard deviation values of Figure 2D.

| Tissue                 | Relative expression values $\pm$ S.D. |                       |                       |
|------------------------|---------------------------------------|-----------------------|-----------------------|
|                        | SCD5A                                 | SCD5B                 | SCD1                  |
| <b>liver</b>           | 0.0005 $\pm$ 3.94E-05                 | 0.0001 $\pm$ 4.56E-05 | 0.1680 $\pm$ 4.73E-03 |
| <b>brain</b>           | 0.1294 $\pm$ 4.42E-03                 | 0.0017 $\pm$ 1.26E-04 | 0.2031 $\pm$ 1.53E-02 |
| <b>pancreas</b>        | 0.0706 $\pm$ 4.62E-03                 | 0.0052 $\pm$ 1.82E-03 | 0.0134 $\pm$ 1.69E-03 |
| <b>kidney</b>          | 0.0136 $\pm$ 9.33E-04                 | 0.0004 $\pm$ 1.16E-04 | 0.0028 $\pm$ 1.29E-04 |
| <b>lung</b>            | 0.0113 $\pm$ 1.62E-03                 | 0.0004 $\pm$ 2.28E-05 | 0.1609 $\pm$ 5.08E-03 |
| <b>small intestine</b> | 0.0034 $\pm$ 1.71E-04                 | 0.0002 $\pm$ 6.53E-05 | 0.0163 $\pm$ 3.41E-03 |
| <b>spleen</b>          | 0.0040 $\pm$ 1.68E-04                 | 0.0002 $\pm$ 5.61E-05 | 0.0190 $\pm$ 3.76E-04 |
| <b>skeletal muscle</b> | 0.0003 $\pm$ 5.39E-05                 | 0.0000 $\pm$ 8.15E-06 | 0.0002 $\pm$ 1.66E-05 |
| <b>ovary</b>           | 0.1890 $\pm$ 1.67E-02                 | 0.0290 $\pm$ 1.72E-03 | 0.0668 $\pm$ 9.78E-03 |
| <b>testis</b>          | 0.0319 $\pm$ 5.04E-03                 | 0.0047 $\pm$ 1.88E-04 | 0.0710 $\pm$ 1.66E-02 |

**Table S3.** Standard deviation values of Figure 2E.

| Tissue                 | % of total SCD5 $\pm$ S.D. |                   |
|------------------------|----------------------------|-------------------|
|                        | SCD5A                      | SCD5B             |
| <b>liver</b>           | 75.19 $\pm$ 10.06          | 24.81 $\pm$ 10.06 |
| <b>brain</b>           | 98.73 $\pm$ 0.11           | 1.27 $\pm$ 0.11   |
| <b>pancreas</b>        | 93.65 $\pm$ 0.85           | 6.35 $\pm$ 0.85   |
| <b>kidney</b>          | 97.54 $\pm$ 0.38           | 2.46 $\pm$ 0.38   |
| <b>lung</b>            | 96.60 $\pm$ 0.62           | 3.40 $\pm$ 0.62   |
| <b>small intesine</b>  | 92.42 $\pm$ 1.32           | 7.58 $\pm$ 1.32   |
| <b>spleen</b>          | 90.65 $\pm$ 7.65           | 9.35 $\pm$ 7.65   |
| <b>skeletal muscle</b> | 88.91 $\pm$ 4.01           | 11.09 $\pm$ 4.01  |
| <b>ovary</b>           | 90.40 $\pm$ 3.23           | 9.60 $\pm$ 3.23   |
| <b>testis</b>          | 93.04 $\pm$ 5.21           | 6.96 $\pm$ 5.21   |

**Table S4.** Standard deviation values of Figure 2F.

| Tissue mRNA            | % of total SCD $\pm$ S.D. |                 |                  |
|------------------------|---------------------------|-----------------|------------------|
|                        | SCD5A                     | SCD5B           | SCD1             |
| <b>liver</b>           | 0.38 $\pm$ 0.13           | 0.13 $\pm$ 0.08 | 99.49 $\pm$ 0.14 |
| <b>brain</b>           | 42.69 $\pm$ 0.55          | 0.55 $\pm$ 0.04 | 56.76 $\pm$ 3.08 |
| <b>pancreas</b>        | 80.56 $\pm$ 5.45          | 5.45 $\pm$ 0.70 | 13.99 $\pm$ 0.55 |
| <b>kidney</b>          | 82.28 $\pm$ 2.07          | 2.07 $\pm$ 0.27 | 15.65 $\pm$ 2.21 |
| <b>lung</b>            | 6.67 $\pm$ 0.24           | 0.24 $\pm$ 0.07 | 93.09 $\pm$ 0.85 |
| <b>small intestine</b> | 18.06 $\pm$ 1.50          | 1.50 $\pm$ 0.42 | 80.44 $\pm$ 2.66 |
| <b>spleen</b>          | 14.73 $\pm$ 1.18          | 1.18 $\pm$ 0.41 | 84.09 $\pm$ 6.45 |
| <b>skeletal muscle</b> | 60.52 $\pm$ 7.69          | 7.69 $\pm$ 3.39 | 31.78 $\pm$ 5.16 |
| <b>ovary</b>           | 72.21 $\pm$ 7.61          | 7.61 $\pm$ 2.29 | 20.18 $\pm$ 2.50 |
| <b>testis</b>          | 46.23 $\pm$ 3.23          | 3.23 $\pm$ 1.97 | 50.54 $\pm$ 6.12 |

**Table S5.** Standard deviation values of Figure S2.

| Tissue                     | Relative expression values $\pm$ S.D. |                       |                       |                       |                       |                       |
|----------------------------|---------------------------------------|-----------------------|-----------------------|-----------------------|-----------------------|-----------------------|
|                            | SCD5A                                 |                       | SCD5B                 |                       | SCD1                  |                       |
|                            | Actin                                 | Tubulin               | Actin                 | Tubulin               | Actin                 | Tubulin               |
| <b>liver</b>               | 0.0039 $\pm$ 1.45E-03                 | 0.0047 $\pm$ 5.20E-04 | 0.0015 $\pm$ 5.06E-04 | 0.0026 $\pm$ 3.93E-04 | 0.8315 $\pm$ 1.75E-01 | 1.2756 $\pm$ 2.18E-01 |
| <b>brain</b>               | 0.5686 $\pm$ 1.48E-01                 | 0.0859 $\pm$ 4.34E-03 | 0.0065 $\pm$ 1.01E-03 | 0.0012 $\pm$ 2.03E-04 | 0.6552 $\pm$ 6.60E-02 | 0.1180 $\pm$ 1.80E-02 |
| <b>pancreas</b>            | 0.2513 $\pm$ 3.27E-02                 | 0.1370 $\pm$ 2.73E-02 | 0.0143 $\pm$ 1.81E-03 | 0.0102 $\pm$ 1.30E-03 | 0.0413 $\pm$ 3.37E-03 | 0.0250 $\pm$ 3.74E-03 |
| <b>kidney</b>              | 0.0357 $\pm$ 6.81E-03                 | 0.0522 $\pm$ 2.64E-03 | 0.0007 $\pm$ 7.24E-05 | 0.0014 $\pm$ 1.31E-04 | 0.0055 $\pm$ 7.27E-05 | 0.0104 $\pm$ 7.63E-04 |
| <b>lung</b>                | 0.0419 $\pm$ 5.70E-03                 | 0.0271 $\pm$ 2.67E-03 | 0.0017 $\pm$ 3.42E-04 | 0.0008 $\pm$ 4.29E-04 | 0.5225 $\pm$ 8.17E-02 | 0.3729 $\pm$ 2.75E-02 |
| <b>small<br/>intesine</b>  | 0.0142 $\pm$ 6.91E-04                 | 0.0144 $\pm$ 4.22E-03 | 0.0012 $\pm$ 4.16E-04 | 0.0014 $\pm$ 6.05E-04 | 0.0560 $\pm$ 3.92E-03 | 0.0609 $\pm$ 1.54E-02 |
| <b>spleen</b>              | 0.0052 $\pm$ 5.41E-04                 | 0.0043 $\pm$ 2.56E-04 | 0.0003 $\pm$ 1.48E-04 | 0.0010 $\pm$ 1.20E-04 | 0.0196 $\pm$ 2.19E-03 | 0.0530 $\pm$ 1.01E-02 |
| <b>skeletal<br/>muscle</b> | 0.0276 $\pm$ 4.76E-03                 | 0.0061 $\pm$ 6.40E-04 | 0.0026 $\pm$ 9.42E-04 | 0.0012 $\pm$ 2.15E-04 | 0.0162 $\pm$ 8.42E-03 | 0.0028 $\pm$ 1.31E-03 |
| <b>ovary</b>               | 1.0894 $\pm$ 3.32E-01                 | 0.2071 $\pm$ 3.53E-02 | 0.0903 $\pm$ 2.34E-02 | 0.0172 $\pm$ 1.27E-03 | 0.2728 $\pm$ 8.78E-02 | 0.0516 $\pm$ 6.81E-03 |
| <b>testis</b>              | 0.4978 $\pm$ 1.25E-01                 | 0.1119 $\pm$ 9.70E-03 | 0.0206 $\pm$ 5.57E-03 | 0.0046 $\pm$ 4.90E-04 | 0.4726 $\pm$ 1.75E-01 | 0.1040 $\pm$ 1.67E-02 |

**Table S6.** Standard deviation values of Figure 4C and E.

| SCD5 expression |            | % of total SCD5 $\pm$ S.D. |                   |
|-----------------|------------|----------------------------|-------------------|
|                 |            | SCD5A                      | SCD5B             |
| mRNA            | endogenous | 69.83 $\pm$ 4.06           | 30.17 $\pm$ 4.06  |
|                 | minigene   | 69.70 $\pm$ 0.74           | 30.30 $\pm$ 0.74  |
| protein         | minigene   | 75.38 $\pm$ 10.27          | 24.62 $\pm$ 10.27 |

**Table S7.** Standard deviation values of Figure S5 and Figure 6B.

|                       | % of total SCD5 mRNA $\pm$ S.D. |                  | % of total SCD5 protein $\pm$ S.D. |                  |
|-----------------------|---------------------------------|------------------|------------------------------------|------------------|
|                       | SCD5A                           | SCD5B            | SCD5A                              | SCD5B            |
| <b>wild type</b>      | 74.87 $\pm$ 1.50                | 25.13 $\pm$ 1.50 | 83.31 $\pm$ 6.57                   | 16.69 $\pm$ 6.57 |
| <b>rs145164872_G</b>  | 79.76 $\pm$ 1.31                | 20.24 $\pm$ 1.31 | 83.03 $\pm$ 6.83                   | 16.97 $\pm$ 6.83 |
| <b>rs1430176385_A</b> | 86.65 $\pm$ 0.88                | 13.35 $\pm$ 0.88 | 99.16 $\pm$ 0.57                   | 0.84 $\pm$ 0.57  |
| <b>rs140750150_G</b>  | 76.64 $\pm$ 5.08                | 23.36 $\pm$ 5.08 | 90.96 $\pm$ 4.14                   | 9.04 $\pm$ 4.14  |
| <b>rs140750150_T</b>  | 74.39 $\pm$ 1.14                | 25.61 $\pm$ 1.14 | 87.57 $\pm$ 4.20                   | 12.43 $\pm$ 4.20 |
| <b>rs1250613148_A</b> | 72.02 $\pm$ 0.49                | 27.98 $\pm$ 0.49 | 83.11 $\pm$ 2.79                   | 16.89 $\pm$ 2.79 |
| <b>rs1225904796_T</b> | 80.41 $\pm$ 3.01                | 19.59 $\pm$ 3.01 | 87.02 $\pm$ 3.84                   | 12.98 $\pm$ 3.84 |
| <b>rs1011850309_A</b> | 71.74 $\pm$ 1.09                | 28.26 $\pm$ 1.09 | 68.24 $\pm$ 6.47                   | 31.76 $\pm$ 6.47 |
| <b>rs1011850309_C</b> | 62.53 $\pm$ 5.53                | 37.47 $\pm$ 5.53 | 24.56 $\pm$ 4.17                   | 75.44 $\pm$ 4.17 |

**Table S8.** Sequence and annealing temperature of cloning primers. Restriction endonuclease recognition sites are highlighted in underlined bold letters.

| Primer name              | Sequence 5' → 3'                                     | T <sub>m</sub> (°C) |
|--------------------------|------------------------------------------------------|---------------------|
| <b>T7</b>                | TAATACGACTCACTATAGGG                                 | 48                  |
| <b>SCD5_e3-AS</b>        | TTCTCCCCTTCTCAATAACA                                 | 48                  |
| <b>SCD5_e3-S</b>         | GAGCCCACCACAAGTACTCA                                 | 54                  |
| <b>SCD5_i3-AS</b>        | ATGACACTGGGCTTAAAGGAA                                | 50                  |
| <b>SCD5_i3-S-NotI</b>    | AAATTT <b><u>GCGGCCGC</u></b> AGATTAGTCATGTGCAGGCTGT | 53                  |
| <b>SCD5_i4-AS-Eco32I</b> | AAATTT <b><u>GATATC</u></b> CACATCTCCTCCATACTTTCACA  | 53                  |
| <b>SCD5_i4-S</b>         | TTACCAAGGTGAGTTAGTACAGAA                             | 52                  |
| <b>SCD5_e4a-AS</b>       | GTTTCCATACATGTGGGCGG                                 | 54                  |
| <b>SCD5_e4a-S</b>        | CTTGGCCTCTATTCTCCGC                                  | 53                  |
| <b>pcDNArev</b>          | TAGAAGGCACAGTCGAGG                                   | 50                  |
| <b>SCD5_RNS-S-XhoI</b>   | AAATTT <b><u>CTCGAG</u></b> GCCTGCCGCTGCTG           | 49                  |
| <b>SCD5_i3-AS-NotI</b>   | AAATTT <b><u>GCGGCCGC</u></b> CTGGGCTTAAAGGAAATCCA   | 50                  |
| <b>SCD5_i4-S-Eco32I</b>  | AAATTT <b><u>GATATC</u></b> TCTTGAAGTGGTGGCCTGTG     | 54                  |
| <b>SCD5_RNS-AS-KpnI</b>  | AAATTT <b><u>GGTACC</u></b> ACATGTGGGATGGCTGTTC      | 51                  |



**Table S9.** Sequence and annealing temperature of mutagenic primers. Nucleotide exchanges are highlighted in underlined bold lowercase letters.

| Mutagenic primer name | Sequence 5' → 3'                           | T <sub>m</sub> (°C) |
|-----------------------|--------------------------------------------|---------------------|
| rs1430176385G>A-S     | TTTTTTATCA <u><b>a</b></u> TACACAGCAC      | 57                  |
| rs1430176385G>A-AS    | TAAAGAAAATGACTGAGAGTTC                     | 57                  |
| rs140750150C>G-S      | TTTATCAGTA <u><b>g</b></u> ACAGCACATC      | 56                  |
| rs140750150C>T-S      | TTTATCAGTA <u><b>t</b></u> ACAGCACATCC     | 56                  |
| rs140750150C>G/T-AS   | AAATAAAGAAAATGACTGAGAG                     | 56                  |
| rs145164872A>G-S      | GATCCAGAGA <u><b>g</b></u> AGTAAGTGAATGGG  | 63                  |
| rs145164872A>G-AS     | CGGACCACAGGATCAGCA                         | 63                  |
| rs1011850309G>A-S     | TGCCCTGTAG <u><b>a</b></u> TACTATAAGATC    | 59                  |
| rs1011850309G>C-S     | TGCCCTGTAG <u><b>c</b></u> TACTATAAGATC    | 57                  |
| rs1011850309G>A/C-AS  | AGACACCATATCACCATG                         | 59                  |
| rs1225904796C>T-S     | GTGTCTTGCC <u><b>t</b></u> TGTAGGTACTATAAG | 60                  |
| rs1225904796C>T-AS    | CATATCACCATGAGGACC                         | 60                  |
| rs1250613148C>A-S     | TGGTGTCTTG <u><b>a</b></u> CCTGTAGGTA      | 65                  |
| rs1250613148C>A-AS    | TATCACCATGAGGACCCG                         | 65                  |
